# Supplementary figures and images for: Protein disulphide isomerase family members show distinct substrate specificity: P5 is targeted to BiP client proteins
Source: Oxford University Press journal article supplement (doi:10.1242/jcs.059154), 2009-11-04

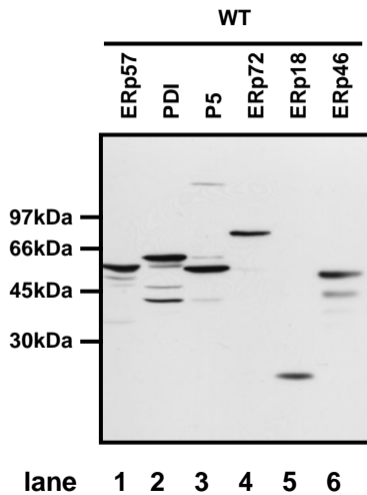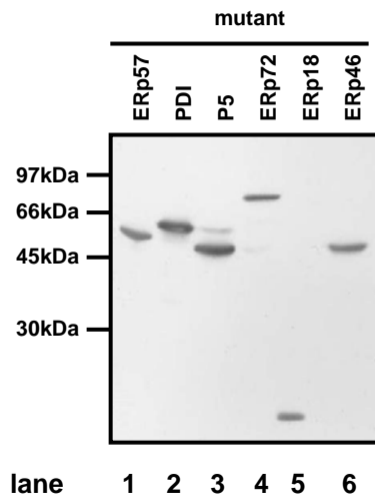

Supplement: jcs059154-sup-059154-figs1.pdf [file jcs059154-sup-059154-figs1.pdf]

IP V5  
Western Ero1

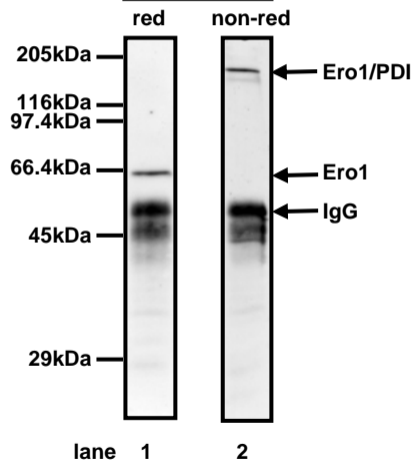

Supplement: jcs059154-sup-059154-figs2.pdf [file jcs059154-sup-059154-figs2.pdf]

**IgG heavy chain**

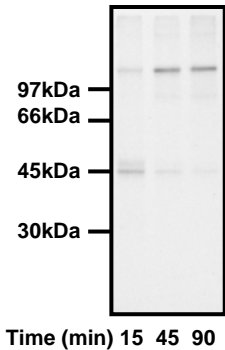

Supplement: jcs059154-sup-059154-figs3.pdf [file jcs059154-sup-059154-figs3.pdf]

### Pentraxin 3

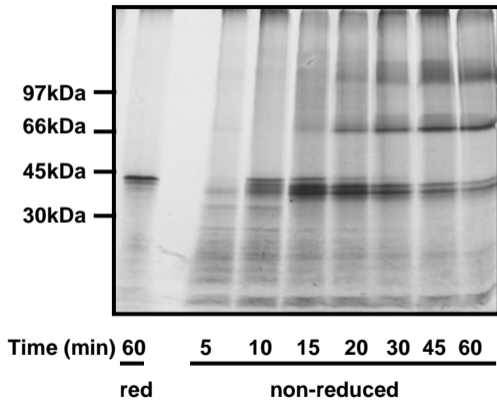

Supplement: jcs059154-sup-059154-figs4.pdf [file jcs059154-sup-059154-figs4.pdf]

procollagen C-propeptide

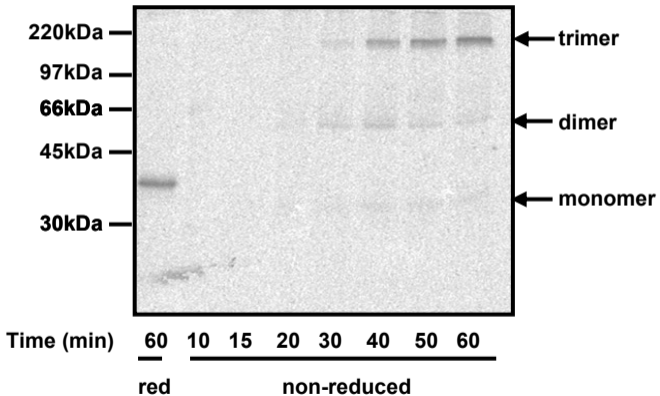

Supplement: jcs059154-sup-059154-figs5.pdf [file jcs059154-sup-059154-figs5.pdf]
